## BLOOD RESPIRATORY PROPERTIES OF RAINBOW TROUT (*SALMO GAIIRDNERI*) KEPT IN WATER OF HIGH CO<sub>2</sub> TENSION

BY F. B. EDDY,\* J. P. LOMHOLT, R. E. WEBER AND K. JOHANSEN

*Department of Zoophysiology, University of Aarhus, DK-800 Aarhus, Denmark*

(Received 1 September 1976)

### SUMMARY

1. Blood O<sub>2</sub> transport and acid-base balance were studied at 20 °C in rainbow trout (*Salmo gairdneri*) which had been kept in water of high CO<sub>2</sub> content (15 mmHg) for at least a week. Also the blood gas chemistry of fish rapidly entering or leaving the hypercapnic environment was studied.

2. Fish entering high CO<sub>2</sub> water suffered a sharp decrease in blood pH which significantly reduced O<sub>2</sub> transport by the blood, but after a few hours considerable compensation was achieved.

3. After at least a week in high CO<sub>2</sub> water, trout showed elevated plasma bicarbonate and P<sub>CO<sub>2</sub></sub> levels, and a decrease in plasma chloride, while pH was about 0.1 pH unit below the level for control fish. Oxygen transport by the blood was marginally reduced.

4. Hypercapnic fish rapidly entering fresh water showed a sharp increase in blood pH and a decrease in blood P<sub>O<sub>2</sub></sub>. These parameters regained normal values after a few hours but plasma bicarbonate and chloride levels took much longer to regain control concentrations.

5. Acid-base balance in hypercapnic fish is discussed with particular reference to the role of the branchial ion exchanges.

### INTRODUCTION

Recent studies have described acute and short-term effects of hypercapnia on respiratory function in fish (Lloyd & White, 1967; Eddy & Morgan, 1969; Cameron & Randall, 1972). In these studies the fish were subjected to high CO<sub>2</sub> for periods of less than 48 h. The effects of longer-term exposure to CO<sub>2</sub> have been investigated rarely and often in relation to its toxicity (Alabaster, Herbert & Hemens, 1957; Lloyd & Jordan, 1964). Janssen & Randall (1975) studied respiratory function in trout exposed to 8 mmHg P<sub>CO<sub>2</sub></sub> for up to 3 days.

Elevated levels of CO<sub>2</sub> may occur in fresh water for several reasons. The breakdown of organic matter in polluted water may produce up to 50 ppm free CO<sub>2</sub> (Hynes, 1960) while the discharge of acid into water of high carbonate content may significantly increase CO<sub>2</sub> tension (Doudoroff & Katz, 1950). Ground waters usually

\* Present address: Department of Biological Sciences, Dundee University, Dundee DD1 4HN, Scotland.

contain significant quantities of  $\text{CO}_2$ , the amount depending on the geographical location. Finally the metabolism of fish produces  $\text{CO}_2$ . This is normally of little importance but when fish are densely stocked and supplied with recirculating ground water (as is the case in some fish farms),  $\text{CO}_2$  tensions of around 20 mmHg are not uncommon.

One of the objectives of the present study was to investigate respiratory properties of blood in rainbow trout which had been exposed to high  $\text{CO}_2$  for at least 1 week. Experiments were also carried out to study the rate at which fish accommodate changes in environmental  $\text{CO}_2$  after transfer from freshwater to high  $\text{CO}_2$  water and the reverse.

#### METHODS

Rainbow trout (*Salmo gairdneri*) weighing 500–12000 g were obtained from the trout farm at Forsögdambruget, Bröns, Denmark, and held indoors in 750 gal freshwater tanks, temperature  $20 \pm 1^\circ\text{C}$ . Oxygen saturation of the water was maintained at near 100% by aeration and the water was replaced by a fresh dechlorinated supply at approximately 50 gal/h. A number of the trout were transferred to a similar tank containing water with a carbon dioxide tension of about 15 mmHg obtained by metering  $\text{CO}_2$  gas into the tank's air supply. Normally each tank contained about 15 fish. The fish remained in this tank to acclimatize for at least a week before being used for experiments. During this period the  $P_{\text{CO}_2}$  of the water remained reasonably constant and rarely fell below 13 mmHg. The fish seemed to suffer no ill effects from this treatment and appeared to be as healthy and active as those in  $\text{CO}_2$ -free fresh water.

Fish selected for an experiment were anaesthetized with MS 222 (Sandoz) and then either the dorsal aorta or the ventral aorta was cannulated as indicated by Hølesten & Randall (1967). They were allowed to recover for at least 24 h in small experimental tanks which were supplied with either fresh water or high  $\text{CO}_2$  water. Houston *et al.* (1973) suggest that at least 24 h are required for recovery from the effects of surgery and anaesthesia. These experimental tanks were designed so that the fish could move backwards and forwards to a small extent, but were too narrow to allow the fish to turn round. The walls and cover were opaque so that the fish were not unduly disturbed by external visual stimuli. Also the design of the tank allowed retrieval of the free end of the cannula with minimum disturbance of the fish. In most cases the processes of blood sampling and flushing the cannula with fresh heparinized saline produced no visible reaction from the fish.

In the transfer experiments fish were lifted by hand from a freshwater tank to an adjacent  $\text{CO}_2$  tank, or the reverse. With practice it was possible to effect the transfer in 2–3 s without disturbing the fish at all. Cameron (1976) working with Arctic grayling describes a similar stress-free method of transfer.

Blood samples (normally 0.3–0.5 ml) were analysed for  $P_{\text{O}_2}$ ,  $P_{\text{CO}_2}$  and pH using a Radiometer PHM71 Mk 2 meter connected to a BMS3 electrode assembly. Blood equilibration was carried out using a Radiometer BMS2 Mk 2 supplied by gas mixing pumps (Wörsthoff) which could be adjusted to deliver air/ $\text{N}_2$  mixtures containing up to 30 mmHg  $P_{\text{CO}_2}$ . Thus  $\text{O}_2$ -Hb equilibrium curves could be constructed at known  $P_{\text{CO}_2}$  and pH values. Oxygen capacity and content were determined using

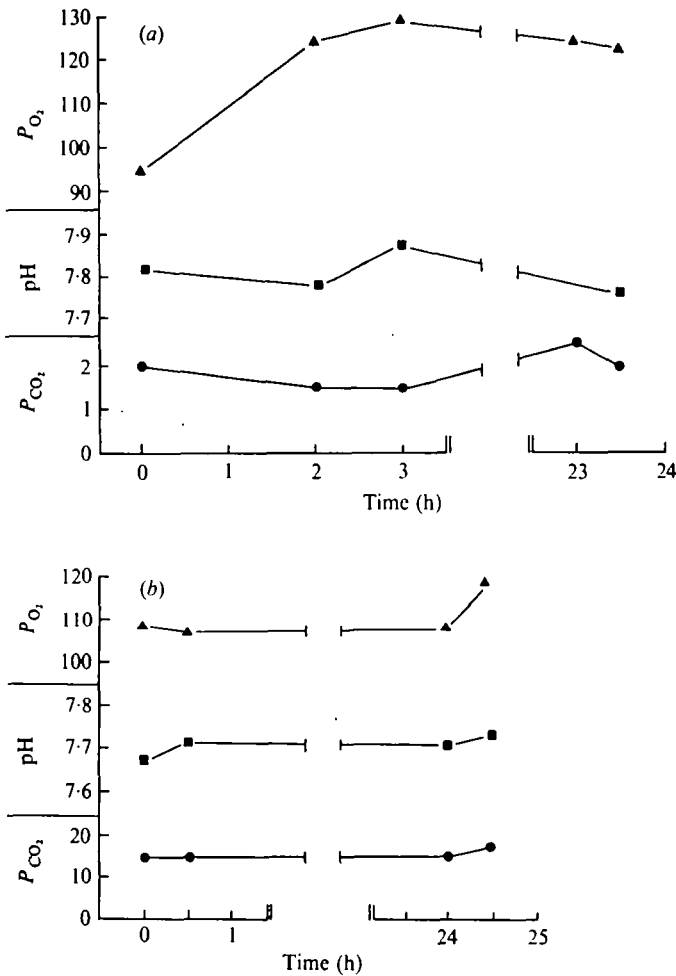

Fig. 1. Arterial  $P_{O_2}$ ,  $P_{CO_2}$  and pH for rainbow trout kept in fresh water (a) or in water containing about 15 mmHg  $P_{CO_2}$  for at least one week (b). Results are for single fish and are typical of results obtained from a total of six hypercapnic and four control fish.

a Lex- $O_2$ -con oxygen analyser (Lexington instruments). Chloride was determined using a Radiometer CMT10 chloride titrator. Normally 3-4 samples were drawn from the fish during the course of the day and a further one the next morning.

In a second series of experiments blood was withdrawn from both groups of fish by heart puncture and this was then used for a number of *in vitro* determinations. Nucleoside triphosphate (NTP) was determined by the Sigma enzymic method (St Louis, U.S.A.), and haemoglobin was estimated spectrophotometrically after quantitative dilution and haemolysis of the blood in 0.1 M Tris buffer, pH 7.5, using the extinction coefficients of human haemoglobin (Antonini & Brunori, 1971).

Table 1. *Blood respiratory characteristics of rainbow trout kept in freshwater (controls) and for a week or more in high CO<sub>2</sub> water, average 15 mmHg P<sub>CO<sub>2</sub></sub> (hypercapnic fish)*

|                                | Control           | Hypercapnic        |
|--------------------------------|-------------------|--------------------|
|                                | Arterial          |                    |
| P <sub>O<sub>2</sub></sub>     | 117 ± 3.5 (16)    | 103.4 ± 2.9 (14)*  |
| P <sub>CO<sub>2</sub></sub>    | 2.03 ± 0.17 (16)  | 15.04 ± 0.33 (13)* |
| pH                             | 7.76 (16)         | 7.66 (15)*         |
| HCO <sub>3</sub> <sup>-</sup>  | 3.78 ± 0.3 (15)   | 23.16 ± 1.56 (11)* |
| H <sub>2</sub> CO <sub>3</sub> | 0.09 ± 0.01 (15)  | 0.69 ± 0.02 (10)*  |
| Cl <sup>-</sup>                | 120.4 ± 1.64 (14) | 102.5 ± 1.48 (20)* |
|                                | Mixed venous      |                    |
| P <sub>O<sub>2</sub></sub>     | 31 (2)            | 35.8 ± 8.64 (5)    |
| P <sub>CO<sub>2</sub></sub>    | 3.25 (2)          | 13.3 ± 0.96 (6)*   |
| pH                             | 7.67 (2)          | 7.65 (6)           |
| HCO <sub>3</sub> <sup>-</sup>  | 5.2 (2)           | 18.9 ± 1.37 (6)*   |
| H <sub>2</sub> CO <sub>3</sub> | 0.15 (2)          | 0.6 ± 0.04 (6)*    |

\* Significantly different at 0.002.

## RESULTS

Rainbow trout which had been living in high CO<sub>2</sub> water for a week or more showed a number of changes in their blood gas characteristics when compared to normal fish. The main differences were that hypercapnic fish showed a lower pH value, and higher values for P<sub>CO<sub>2</sub></sub>, HCO<sub>3</sub><sup>-</sup>, H<sub>2</sub>CO<sub>3</sub> + dissolved CO<sub>2</sub> (Fig. 1, Table 1).

Analysis of haemoglobin and total nucleoside triphosphate revealed similar concentrations for each group. The NTP/Hb ratio for hypercapnic fish was 1.06 while that for normal fish was 1.03. The O<sub>2</sub>-Hb equilibrium data has been arranged to present the curves at constant pH (Fig. 3) and individual values for P<sub>50</sub> and the Root effect are shown in Fig. 2(a) and (b).

O<sub>2</sub>-Hb equilibrium curves show that at similar pH values the Root effect was larger in hypercapnic fish, and blood oxygen affinity of those fish was lower, while values of *n* from Hill equation plots were about the same for both groups (Fig. 2a, b). The O<sub>2</sub>-Hb equilibrium curves (Fig. 3) together with the Root effect data (Fig. 2a) were used to determine percent O<sub>2</sub> saturation of arterial and venous blood for both groups of fish (Table 2). Here it can be seen that O<sub>2</sub> transport is disturbed immediately after transfer from fresh water to high CO<sub>2</sub> water (or vice versa). However, in each case the situation is almost normal again after a period of about 6 h (Figs. 4, 5).

The response of fish when transferred from fresh water to high CO<sub>2</sub> water, or the reverse, could be broadly divided into two phases. First, the initial response lasting about an hour, and then the recovery phase lasting up to 24 h. When first transferred to high CO<sub>2</sub> water the fish showed a sharp drop in blood pH, a rapid increase in P<sub>CO<sub>2</sub></sub>, and a slow rise in bicarbonate. Blood P<sub>O<sub>2</sub></sub> was little altered, but the drop in arterial pH would have resulted in a decrease in arterial oxygen content via the Root effect (Table 2). After about 20 h all values had reached new equilibrium values; notably blood pH had levelled off about 0.1 pH unit below the normal value (Fig. 1).

Fish transferred from high CO<sub>2</sub> water to fresh water showed an immediate increase in blood pH and rapid decreases in P<sub>O<sub>2</sub></sub> and P<sub>CO<sub>2</sub></sub>. However, blood HCO<sub>3</sub><sup>-</sup> showed a much more gradual decrease (Fig. 5). The high arterial blood pH values shown shortly

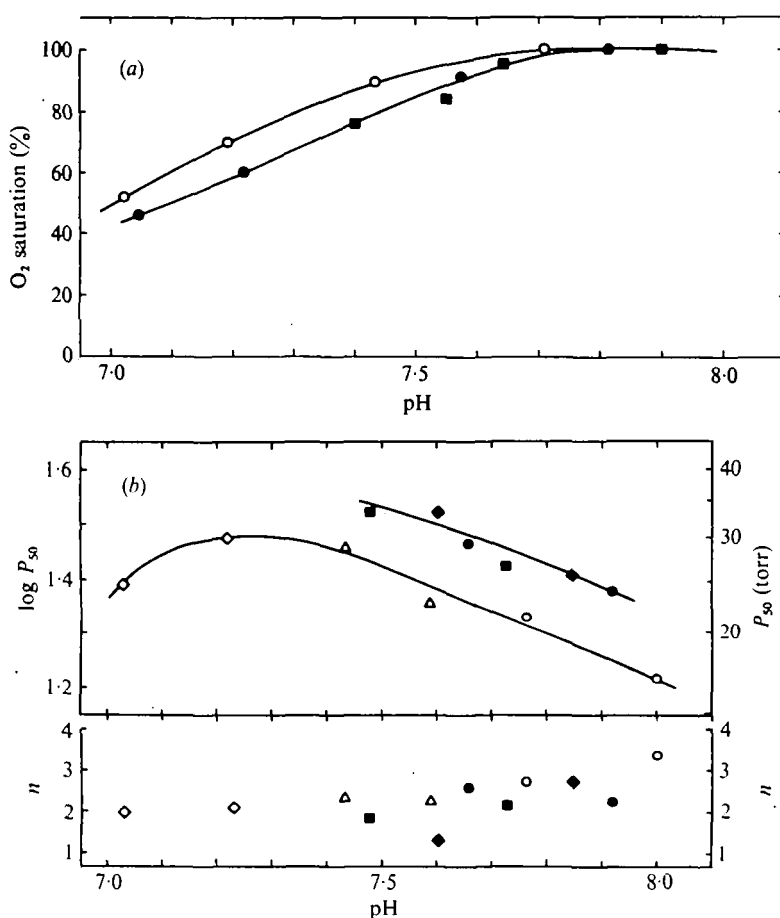

Fig. 2. *Salmo gairdneri*. (a) The Root effect in normal fish (open symbols) and hypercapnic fish (closed symbols). (b) Half saturation oxygen tension,  $P_{50}$ , and Hill's coefficient,  $n$ , as a function of pH in normal fish (open symbols) and hypercapnic fish (closed symbols). Different symbols refer to individual fish.

after transfer indicate that arterial blood became fully O<sub>2</sub> saturated at comparatively low  $P_{O_2}$  tensions, the Root effect being absent and the Bohr effect tending to shift the dissociation curve significantly to the left (higher blood O<sub>2</sub> affinity).

## DISCUSSION

### *Oxygen transport by the blood*

#### (a) *Fish entering high CO<sub>2</sub> water*

These fish show a sharp decrease in blood pH (Fig. 4) which has several effects on blood oxygenation.

(i) Even though  $P_{O_2}$  remains at around 100 mmHg, arterial saturation is reduced to around 70% (Table 2, Fig. 2a) and arterial blood carries less O<sub>2</sub> per unit volume.

(ii) The Bohr effect operates to increase blood O<sub>2</sub> loading and unloading tensions.

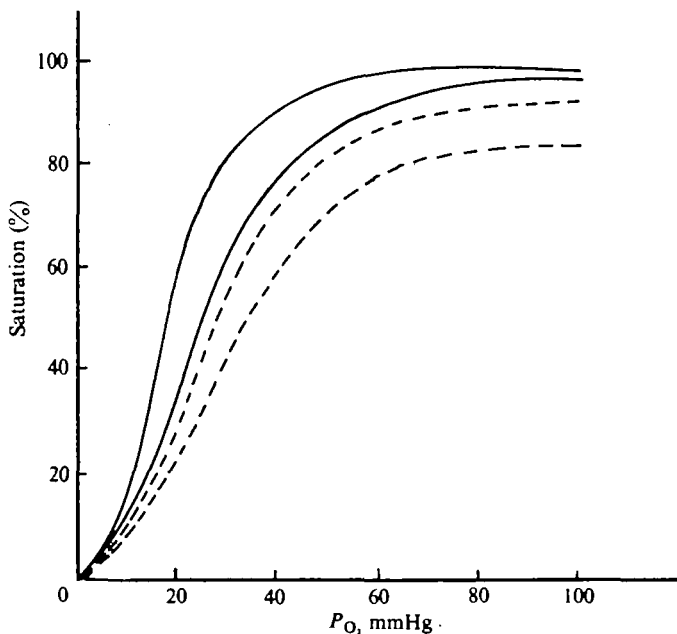

Fig. 3.  $O_2$ -Hb binding curves of rainbow trout blood at 20 °C. Solid lines, pH 7.9; broken lines, pH 7.5. In each case the curve displaced to the left (indicating greater  $O_2$  affinity) is for control fish, and the curve to the right is for hypercapnic fish. The curves are based on data from three hypercapnic and three control fish.

Thus, at any given tissue  $P_{O_2}$ , more  $O_2$  can be unloaded, but for fish entering high  $CO_2$  water this advantage is greatly reduced because, compared to the controls (Table 2), they have lower venous  $O_2$  tensions.

(iii) Because of (i) and (ii) above, efficiency of  $O_2$  uptake by the blood and  $O_2$  removal from the water is decreased. Other factors such as changes in gill ventilation and perfusion may change, but the net effect is that the blood becomes a less efficient medium for  $O_2$  transport.

The fish attempts to remedy this situation by adjustments to circulatory, ventilatory and other systems which would normally increase  $O_2$  delivery to the tissues. However, increased gill ventilation as observed by Janssen & Randall (1975) and Eddy (1976) is unlikely to improve blood oxygenation to any great extent. Thus during the initial period of hypercapnia the fish will have a diminished scope for increasing its  $O_2$  uptake and therefore its activity. However, after 6 h there is some compensation and after 24 h this is almost complete (Figs. 1, 4).

#### (b) *Physiological adaptation to the hypercapnic environment*

After at least 24 h, hypercapnic swimming performance of salmon is little impeded (Dahlberg, Surnway & Duodoroff, 1968), plasma  $HCO_3^-$  of rainbow trout is increased (Lloyd & White, 1967) and blood  $O_2$  carrying capacity is improved (Eddy, 1976). In the present experiments blood gas data suggest that compensation is incomplete even in fish which had been hypercapnic for more than 2 weeks. Arterial pH is consistently lower than normal by about 0.1 pH unit (Fig. 1, Table 1), although the data of

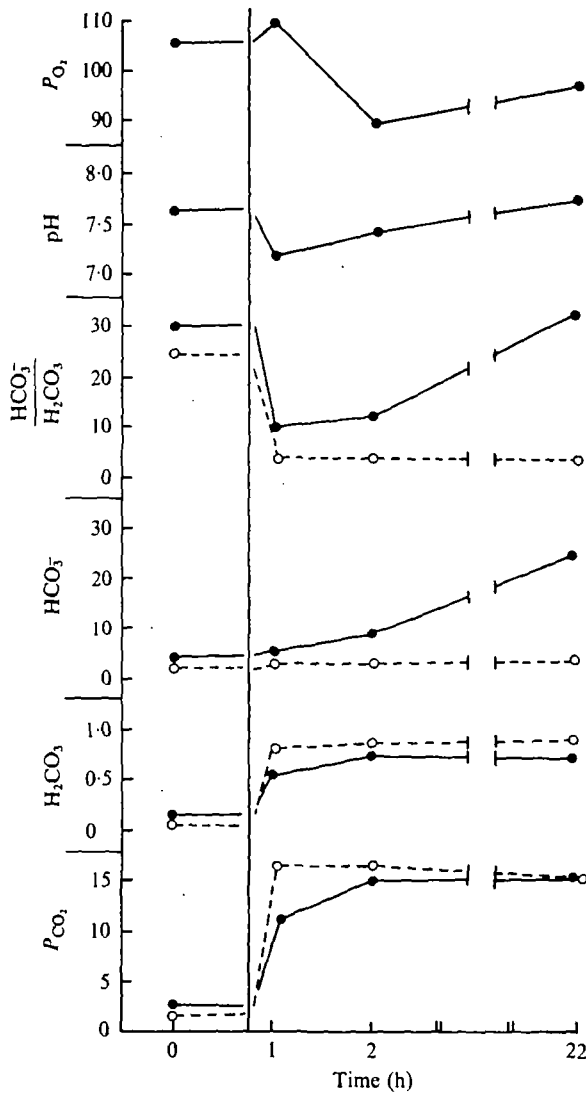

Fig. 4. Blood gas physiology of a rainbow trout rapidly transferred from fresh water to high  $CO_2$  water (approx 15 mmHg  $P_{CO_2}$ ). Open symbols refer to water while solid symbols refer to arterial blood.

Janssen & Randall (1975) indicate that this parameter has regained normal levels after 3 days hypercapnia. In their experiments on rainbow trout lower levels of  $CO_2$  were used (8 mmHg compared to 15 mmHg) and it is reasonable to assume that trout are less able to adjust to higher levels of  $CO_2$ . Secondly their experiments were conducted at a lower temperature, 9 °C compared to 20 °C.

Analysis of red cell contents reveals a number of interesting points. First it is known that increased cellular ATP will increase the Root effect (Weber & de Wilde, 1975) and increased cellular ATP is often associated with decreased intraerythrocyte pH (Wood & Johansen, 1973), a condition likely to exist in hypercapnic trout. Analysis of

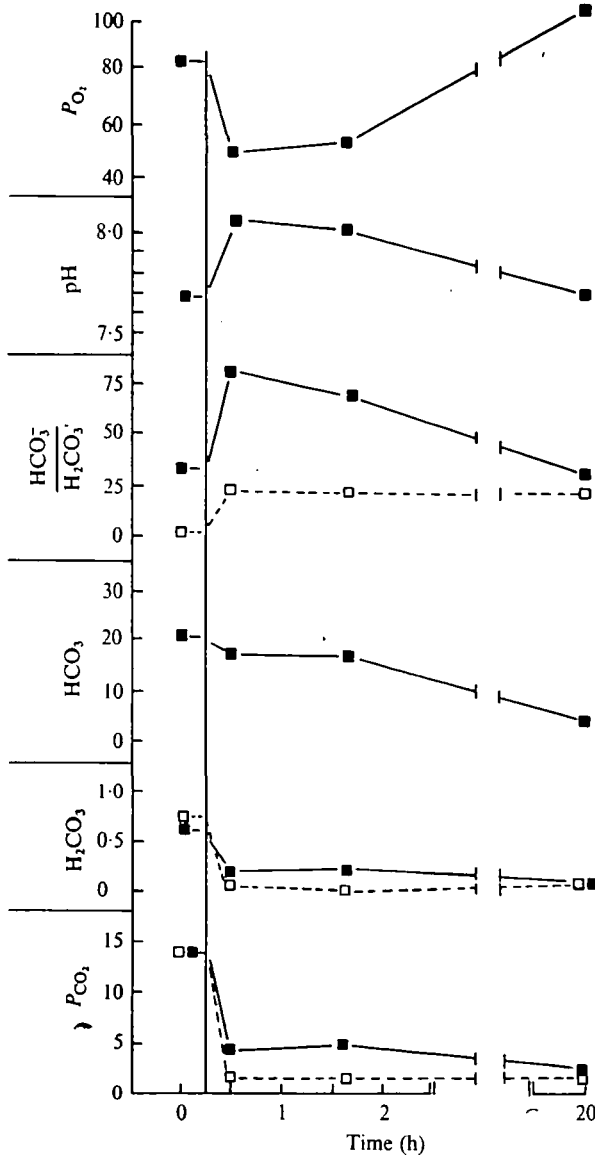

Fig. 5. Blood gas physiology of a rainbow trout rapidly transferred from high  $CO_2$  water (approx. 15 mmHg) to fresh water. Open symbols refer to water while solid symbols refer to arterial blood.

erythrocyte nucleoside triphosphates, which in trout are 90% ATP and 10% GTP (Lykkeboe, personal communication) indicate that their concentrations are approximately equal in both normal and hypercapnic fish, and an increase in the Root effect from this cause seems unlikely in hypercapnic trout. Thus the increased Root effect observed in hypercapnic trout may be explained by decreased intraerythrocytic pH (Schaefer, Messier & Morgan, 1970; Eddy, 1976) or perhaps a direct  $CO_2$  effect (Riggs, 1970). Both Börjeson & Höglund (1976) and Eddy & Morgan (1969) report a reduction in the Root effect in  $CO_2$  adapted salmonids, which disagrees with the



Table 2. In vivo  $O_2$  transport by rainbow trout blood when the fish was transferred from fresh water to high  $CO_2$  water (a) and from high  $CO_2$  water to fresh water (b)

| (a) Fresh water to 15 mmHg $P_{CO_2}$ in the water |                   |      |                    |      |                      |      |
|----------------------------------------------------|-------------------|------|--------------------|------|----------------------|------|
| $P_{O_2}$<br>Sat. (%)<br>pH<br>$P_{CO_2}$          | Fresh water       |      | 15 min high $CO_2$ |      | 6+ hours high $CO_2$ |      |
|                                                    | Art.              | Ven. | Art.               | Ven. | Art.                 | Ven. |
|                                                    | 117               | 33   | 110                | 21   | 103                  | 35   |
|                                                    | 95                | 70   | 62                 | 25   | 95                   | 68   |
|                                                    | 7.76              | 7.67 | 7.20               | 6.98 | 7.76                 | 7.65 |
|                                                    | 2                 | 3.5  | 11                 | 14   | 15                   | —    |
| (b) High $CO_2$ to fresh water                     |                   |      |                    |      |                      |      |
| $P_{O_2}$<br>Sat. (%)<br>pH<br>$P_{CO_2}$          | High $CO_2$ water |      | 15 min fresh water |      | 6+h fresh water      |      |
|                                                    | Art.              | Ven. | Art.               | Ven. | Art.                 | Ven. |
|                                                    | 88                | 54   | 54                 | 35   | 117                  | 35   |
|                                                    | 95                | 80   | 95                 | 90   | 95                   | 70   |
|                                                    | 7.66              | 7.65 | 8.03               | 7.95 | 7.76                 | 7.67 |
|                                                    | 13                | 13   | 6                  | 7    | 2                    | 3.3  |

Arterial values are means for three fish while mixed venous values are for a single fish in each case.

present results (Fig. 2); this topic requires further investigation. Decreased  $O_2$  affinity of hypercapnic fish when expressed at constant pH, rather than constant  $P_{CO_2}$  (Eddy & Morgan, 1969), could also be accounted for by lower intracellular pH values, but this factor appears to have a marginal influence on  $O_2$  transport.

### (c) Fish leaving the hypercapnic environment

$CO_2$  rapidly diffuses out of the gills leaving the blood alkaline with pH values of pH 8.0 or more and low  $CO_2$  tensions. Similar pH values were obtained by  $HCO_3^-$  injection (Janssen & Randall, 1975) but this procedure tends to increase  $P_{CO_2}$  as well. In the present experiments the Root effect is without influence on arterial blood (Fig. 2a) while the Bohr effect significantly increases blood  $O_2$  affinity such that full arterial  $O_2$  saturation occurs at the observed low arterial  $P_{O_2}$  values of around 50 mmHg (Fig. 5, Table 2). Hence the  $O_2$  unloading tension is also decreased and from the few data available for venous blood this appears to be the case (Table 2). Normal blood pH values are resumed after 12–24 h (Fig. 5) and the rate limiting step appears to be removal of  $HCO_3^-$  from the plasma.

**Acid-base balance.** After a few minutes in high  $CO_2$  water the carbonic acid content of the blood increased from 0.09 to 0.69 mM (Table 1). (For convenience carbonic acid will be used to refer  $H_2CO_3$  and dissolved  $CO_2$  together.) The  $HCO_3^-$  concentration required to restore blood pH to around pH 7.7 can be calculated to be about 25 mM using the Henderson–Hasselbalch equation (values for  $pK'$  and  $CO_2$  solubility from Severinghaus, Stupfel & Bradley, 1956), and after 20 h hypercapnia this is indeed observed (Table 1). Cameron (1976) suggests that this  $HCO_3^-$  originates from retained metabolic  $CO_2$ ; however, each equivalent of  $CO_2$  retained as  $HCO_3^-$  will generate an equivalent of  $H^+$  and displace approximately the same amount of  $Cl^-$  from the blood plasma (Lloyd & White, 1967, and Table 1). Thus over 24 h hypercapnia the trout increases the bicarbonate concentration of the extracellular fluid

by about 20 mM and similar amounts of  $\text{Cl}^-$  and  $\text{H}^+$  will need to be removed. The possible mechanisms underlying these changes will now be examined.

Obviously the difference between the rates of acid excretion ( $\text{Na}^+/\text{H}^+$  and  $\text{Na}^+/\text{NH}_4^+$  exchange) and base retention ( $\text{HCO}_3^-/\text{Cl}^-$  exchange) (Maetz, 1971, 1973) will determine blood pH at any instant. Values from the literature for trout in fresh water indicate that Na influx usually exceeds  $\text{Cl}^-$  influx by a significant amount (Kerstetter & Kirschner, 1972; Lahlou *et al.* 1975) and this may be related to the species' carnivorous diet which would lead to an excess of metabolic acid. In Arctic grayling transferred to high  $\text{CO}_2$  water Cameron (1976) observed an increase in  $\text{Na}^+$  influx while  $\text{Cl}^-$  decreased, giving an increased capacity for acid excretion, and, assuming a 1:1 exchange, 66 h would be needed to remove the  $\text{H}^+$  generated by retention of respiratory  $\text{CO}_2$ . Thus the branchial ion exchanges appear to be mechanisms capable of maintaining body  $\text{Na}^+$ ,  $\text{H}^+$  and  $\text{Cl}^-$  concentrations at the correct levels under normal conditions, but are not well adjusted to deal rapidly with large amounts of acid such as are generated during hypercapnia.

It is of interest that in hypercapnic dogfish (Heister, Weitz & Weitz, 1976) blood pH is stabilized by  $\text{HCO}_3^-$  entering the extracellular fluid both from the sea water and from the cellular compartment. Uptake of  $\text{HCO}_3^-$  from the water by reversal of the  $\text{HCO}_3^-/\text{Cl}^-$  exchange was observed in goldfish by Dejours (1969). The role of these mechanisms in acid-base balance requires further study.

In hypercapnic trout the fall in plasma  $\text{Cl}^-$  (Table 1) could be achieved if the efflux exceeded the rate of active uptake, and this was observed to be the case for hypercapnic grayling (Cameron, 1976). But even in fresh water both  $\text{Na}^+$  and  $\text{Cl}^-$  showed negative net uptakes and it is possible that this is a normal state in Arctic grayling (and other fish) the ionic balance being made good in the diet.

Hypercapnic fish entering fresh water immediately lose about 0.5 mM- $\text{H}_2\text{CO}_3$  from the blood and this is sufficient to increase the plasma  $\text{HCO}_3^-/\text{H}_2\text{CO}_3$  ratio from 30 to about 100 (Fig. 5), and blood pH to pH 8.0 or more. If blood pH is restored to normal levels then about 20 mM  $\text{HCO}_3^-$  needs to be removed from the extracellular fluid together with significant quantities of  $\text{H}^+$  which have accumulated in the body cells. If the bicarbonate space of a 1 kg fish is assumed to be 30% then  $20 \times 0.3 = 6$  mM- $\text{HCO}_3^-$  has to be removed. If the  $\text{HCO}_3^-/\text{Cl}^-$  exchange operates at about  $330/\mu\text{M kg}^{-1} \text{ h}^{-1}$  (Kerstetter & Kirschner, 1972) then  $6/0.33 = 18$  h will be required. Plasma  $\text{HCO}_3^-$  probably decreases more rapidly than this because  $\text{H}^+$  released from the cellular compartment will convert  $\text{HCO}_3^-$  to  $\text{CO}_2$  which then diffuses rapidly from the gills. The rate at which  $\text{Cl}^-$  is restored to the plasma will depend upon the difference between passive efflux and active uptake. Thus if 6 mM of  $\text{Cl}^-$  are required and the passive efflux is  $200 \mu\text{M kg}^{-1} \text{ h}^{-1}$  (Kerstetter & Kirschner, 1972), then it will take  $6/(0.33-0.2) = 46$  h. Lloyd & White (1967) noted in hypercapnic fish transferred to fresh water that plasma  $\text{Cl}^-$  returned to normal levels more slowly than did plasma  $\text{HCO}_3^-$ .

In conclusion it is worth mentioning that trout are remarkably tolerant to changes in blood pH. Changes of 0.5 pH or more were recorded in some experimental fish and these were tolerated without undue ill effects.

This work was supported by the Danish Natural Science Research Council. Skilled technical assistance from Sonja Kornerup and Winnie Heidemann is acknowledged.

## REFERENCES

- ALABASTER, J. S., HERBERT, D. W. M. & HEMENS, J. (1957). The survival of rainbow trout (*Salmo gairdneri* Richardson) and perch (*Perca fluviatilis* L.) at various concentrations of dissolved oxygen and carbon dioxide. *Ann. appl. Biol.* **45**, 177-88.
- ANTONINI, E. & BRUNORI (1971). *Hemoglobin and Myoglobin in their Reaction with Ligands*, pp. 13-39. Amsterdam: North Holland.
- BØRJESON, H. & HÖGLUND (1976). Swimbladder gas and Root effect in young salmon during hypercapnia. *Comp. Biochem. Physiol.* **54A**, 335-9.
- CAMERON, J. N. (1976). Branchial ion uptakes in Arctic grayling: resting values and effects of acid-base disturbance. *J. exp. Biol.* **64**, 711-25.
- CAMERON, J. N. & RANDALL, D. J. (1972). The effect of increased ambient CO<sub>2</sub> on arterial CO<sub>2</sub> tension, CO<sub>2</sub> content and pH in rainbow trout. *J. exp. Biol.* **57**, 673-80.
- DAHLBERG, M. L., SURNWAY, D. L. & DUODOROFF, P. (1968). Influence of dissolved oxygen and carbon dioxide on swimming performance of large mouth bass and coho salmon. *J. Fish. Res. Bd Can.* **25**, 49-70.
- DEJOURS, P. (1969). Variation of CO<sub>2</sub> output of a freshwater teleost upon change of the ionic composition of water. *J. Physiol., Lond.* **202**, 13-14.
- DUODOROFF, P. & KATZ, M. (1950). Critical review of the literature on the toxicity of industrial wastes to fish. I. Alkalis, acids and inorganic gases. *Sewage ind. Wastes*.
- EDDY, F. B. & MORGAN, R. I. G. (1969). Some effects of carbon dioxide on the blood of rainbow trout *Salmo gairdneri* Richardson. *J. Fish Biol.* **1**, 361-72.
- EDDY, F. B. (1976). Acid-base balance in rainbow trout (*Salmo gairdneri*) subjected to acid stresses. *J. exp. Biol.* **64**, 159-71.
- HEISTER, N., WEITZ, H. & WEITZ, A. M. (1976). Hypercapnia and resultant bicarbonate transfer processes in an elasmobranch fish. *Bull. europ. Physiopath. resp.* **12**, 77-85.
- HOLETON, G. E. & RANDALL, D. J. (1967). The effect of hypoxia on the partial pressure of gases in the blood and water afferent and efferent to the gills of rainbow trout. *J. exp. Biol.* **46**, 317-27.
- HOUSTON, A. H., CZERWINSKI, C. L. & WOODS, R. J. (1973). Cardiovascular-Respiratory activity during recovery from anesthesia and surgery in Brook trout (*Salvelinus fontinalis*) and carp (*Cyprinus carpio*). *J. Fish. Res. Bd Can.* **30**, 1075-1712.
- HYNES, H. B. N. (1960). *The Biology of Polluted Waters*. Liverpool: Liverpool University Press.
- JANSEN, R. G. & RANDALL, D. J. (1975). The effects of changes in pH and in P<sub>CO<sub>2</sub></sub> in blood and water on breathing in rainbow trout, *Salmo gairdneri*. *Respir. Physiol.* **25**, 235-45.
- KERSTETTER, T. H. & KIRSCHNER, L. B. (1972). Active chloride transport by the gills of rainbow trout (*Salmo gairdneri*). *J. exp. Biol.* **56**, 263-72.
- LAHLOU, B., CRENESSE, D., BENSALA-TELET, A. & PORTE-NIBELLE, J. (1975). Adaptation de la truite d'élevage à l'eau de mer. Effets sur les concentrations plasmatiques, les échanges branchiaux et le transport intestinal du sodium. *J. Physiol., Paris*, **70**, 593-603.
- LLOYD, R. L. & JORDAN, D. H. M. (1964). Some factors affecting the resistance of rainbow trout (*Salmo gairdneri* Richardson) to acid waters. *Int. J. Air. Wat. Poll.* **8**, 393-403.
- LLOYD, R. L. & WHITE, W. R. (1967). Effects of high concentration of carbon dioxide on the ionic composition of rainbow trout blood. *Nature, Lond.* **216**, 1341-2.
- MAETZ, J. (1971). Fish gills: mechanisms of salt transfer in fresh water and sea water. *Phil. Trans. R. Soc. Lond. B* **262**, 209-49.
- MAETZ, J. (1973). Na<sup>+</sup>/NH<sub>4</sub><sup>+</sup>, Na<sup>+</sup>/H<sup>+</sup> exchanges and NH<sub>3</sub> movement across the gill of *Carassius auratus*. *J. exp. Biol.* **58**, 255-75.
- MAETZ, J. & GARCIA-ROMEY, F. (1964). The mechanism of sodium and chloride uptake by the gills of a freshwater fish *Carassius auratus*. II. Evidence for NH<sub>4</sub><sup>+</sup>/Na<sup>+</sup> and HCO<sub>3</sub><sup>-</sup>/Cl<sup>-</sup> exchanges. *J. gen. Physiol.* **47**, 1209-27.
- MAREN, T. H. (1967). Carbonic anhydrase: chemistry, physiology and inhibition. *Physiol. Rev.* **47**, 595-781.
- RIGGS, A. (1970). Properties of fish haemoglobins. In *Fish Physiology*, vol. 4 (ed. W. S. Hoar and D. J. Randall). New York: Academic Press.
- SCHAEFER, K. E., MESSIER, A. A. & MORGAN, C. C. (1970). Displacement of oxygen dissociation curves and red cell cation exchange in chronic hypercapnia. *Resp. Physiol.* **10**, 299-312.
- SEVERINGHAUS, J. W., STUPPEL, M. & BRADLEY, A. F. (1956). Variations of serum carbonic acid pK<sup>1</sup> with pH and temperature. *J. appl. Physiol.* **9**, 179-200.
- WEBER, R. E. & DE WILDE, A. M. (1975). Oxygenation properties of haemoglobins from flat fish plaice (*Pleuronectes platessa*) and flounder (*Platichthys flesus*). *J. comp. Physiol.* **101**, 99-110.
- WOOD, S. & JOHANSEN, K. (1973). Organic phosphate metabolism in nucleated red cells: Influence of hypoxia on eel HbO<sub>2</sub> affinity. *Neth. J. Sea. Res.* **7**, 328-38.
